# Supplementary material
Source: Research Square preprint supplement (doi:10.21203/rs.3.rs-8963582/v1)
Supplement: Supplementary file 2 [file b9bac6060a8d33dd1ca9f233.docx]

**Scheme 1.** Schematic representation of the synthesis of CDs using a microwave-assisted reverse micelle approach.
